# Supplementary material for: Co-solvent enhanced zinc oxysulfide buffer layers in Kesterite copper zinc tin selenide solar cells
Source: Royal Society of Chemistry journal article supplement (doi:10.1039/c5cp01607j), 2015-01-01
Supplement: c5cp01607j1.pdf [file c5cp01607j1.pdf]

## Co-solvent Enhanced Zinc Oxysulfide Buffer Layers in Kesterite Copper Zinc Tin Selenide Solar Cells

K. Xerxes Steirer,<sup>a\*</sup> Rebekah L. Garris,<sup>a</sup> Jian V. Li,<sup>a</sup> Michael J. Dzara,<sup>b</sup> Paul F. Ndione,<sup>a</sup> Kannan Ramanathan,<sup>a</sup> Ingrid Repins,<sup>a</sup> Glenn Teeter,<sup>a</sup> Craig L. Perkins<sup>a</sup>

### Supporting Information:

**S1:** Data from literature survey with 121  $E_g$  values from peer reviewed journal articles compiled along with their corresponding ion concentrations. Additional information such as references and ligand type is also provided in SI file ZnS\_CBD\_Data.csv.

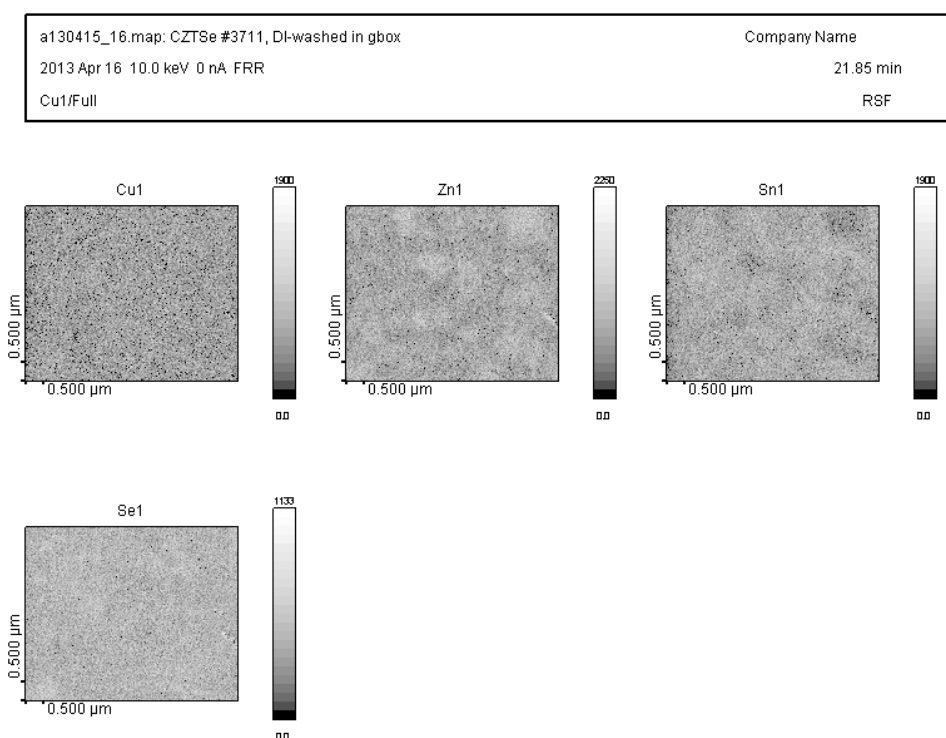

**Figure S2:** Auger electron spectroscopy map of Cu, Zn, Sn and Se. Slight variations in intensity are due to the rough polycrystalline film surface.

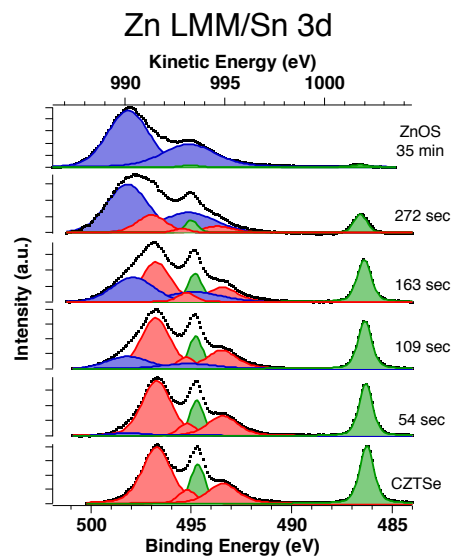

**Figure S3:** Zn LMM lineshape analysis showing distinct chemical environments for CZTSe and CBD-ZnOS.

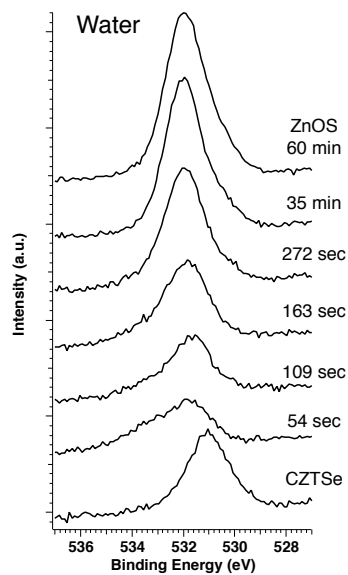

**Figure S4:** CZTSe/CBD-ZnOS layer-by-layer XPS of O 1s showing removal and/or conversion of surface oxide and subsequent ZnOS growth. The film ends in largely ZnOS with some ZnO evidenced by the low BE tail.

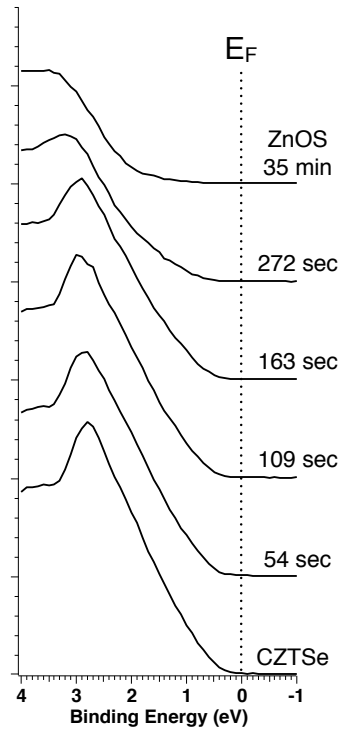

**Figure S5:** Representative VB spectra for CZTSe/ZnOS heterojunction formed layer-by-layer.

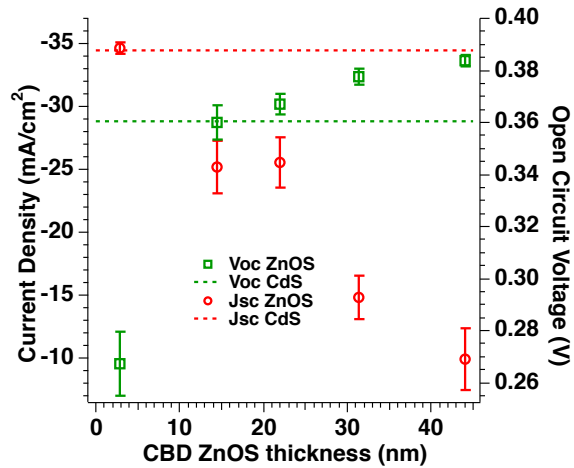

**Figure S6:** Thickness dependence of  $J_{sc}$  and  $V_{oc}$  for devices made with water+DMSO CBD-ZnOS buffer layers.  $V_{oc}$  and  $J_{sc}$  for optimized CdS buffered devices is shown for comparison (dashed lines). The CdS buffered device reaches over 8% power conversion efficiency with  $V_{oc}$  of 0.36 V and  $J_{sc}$  of 34.5 mA/cm<sup>2</sup>.  $V_{oc}$  increases as the buffer nucleates and fills in to cover the absorber surface and matches the CdS performance. However,  $J_{sc}$  falls quickly as the buffer thickness increases.
