# Supplementary material for: Co-solvent enhanced zinc oxysulfide buffer layers in Kesterite copper zinc tin selenide solar cells
Source: Royal Society of Chemistry journal article supplement (doi:10.1039/c5cp01607j), 2015-01-01
Supplement: zns_cbd_data.csv [file zns_cbd_data.csv]

Title	1st Author	Year	Eg_Opt (eV)	Bath Notes	[Zn2+] (M)	[S2-] (M)	[C.A.1] (M)	C.A.1 species	[C.A.2] (M)	C.A.2 species	Temp (oC)	Growth Rate (nm/min)	Hydrazine	Authors	Journal	Volume	Pg.	Notes
Process and Film Characterization of CBD ZnS Thin Films	J. M. Dona	1994	3.76	NH2-NH2	0.025	0.035	1				70	0.583	Yes	J. M. Dona and J. Herrero	J. Electrochem. Soc.	141	205-210	Only one Eg reported
Conditions for the chemical deposition of thin films of cadmium sulfide on a solid surface	G. A. Kitaev	1965	3.76	NH2-NH2	2.5	0.035	1	NH3	3	Hydrazine	NaN	NaN	Yes	G.A. Kitaev, A. A. Uritskaya and S. G. Moksushin, Russ. J. Phys. Chem. 1965, 39, 1101.	Russ. J. Phys. Chem.	39	1101	Data from O'Brien review
Solution growth, characterization and applications of ZnS thin films	I. C. Ndukwe	1996	3.7	ZnCl2, NH2-NH2	1	1	10				16.7	NaN	Yes	I. C. Ndukwe	Sol. Energy Mater. Sol. Cells	40	123-131
Phase formation processes in solution at the atomic level: Metal chalcogenide semiconductors	M. Froment	1995	4.1	NH2-NH2, Zn acetate, TAA, NH4Cl	0.005	0.005	1.5	Hydrazine	0.02	NH4	NaN	NaN	Yes	Froment, M. & Lincot, D. Phase formation processes in solution at the atomic level: Metal chalcogenide semiconductors.	Electrochimica Acta	40	1293	From O'Brien review.
Stability Constant of Metal Ion Complexes	L. G. Sillen	1971	3.4	ZnCl2, Na2S2O3, acidic	0.1	0.1	NaN				85	NaN	No	L.G. Sillen, A.F. Martell Eds.	The Chemical Society, London			Suppl. 1, Special Publication No. 25
Kinetics of Precipitation	A. E. Nielsen	1964	3.6	ZnCl2, TAA	0.2	0.04	2	NH3			NaN	NaN	No	A. E. Nielsen	Pergamon Press, Oxford, 1964
Kinetics of Precipitation	A. E. Nielsen	1964	4.1	ZnCl2, TAA	0.02	0.02	NaN	NH3			NaN	NaN	No	A. E. Nielsen	Pergamon Press, Oxford, 1964
Chemical-Deposition of Zinc Hydroxosulfide Thin-Films from Zinc(II) - Ammonia-Thiourea Solutions	B. Mokili	1995	3.85	ZnCl2, NH2-NH2	0.133	0.125	NaN				25	0.15	Yes	B. Mokili, M. Froment and D. Lincot	J. Phys. III	5	C3261	(Chemical-Deposition of Zinc Hydroxosulfide Thin-Films from Zinc(II) - Ammonia-Thiourea Solutions, B. Mokili, M. Froment, D. Lincot)
Band Offset of High Efficiency CBD-ZnS/CIGS Thin Film Solar Cells	Tokio Nakada	2003	3.7	Two step deposition	0.16	0.6	7.5				80	NaN	No	T. Nakada, M. Hongo, and E. Hayashi	Thin Solid Films	431-432	242-248	Only one Eg reported
18% Efficiency Cd Free CIGS Thin Film Solar Cells Fabricated Using CBD-ZnS Buffer Layers	Tokio Nakada	2002	3.8	Two step deposition	0.16	0.6	7.5				80	2	No	T. Nakada, and M. Mizutani	J. Appl. Phys.	41	L 165 - L 167	Only one Eg reported
High Quality Antireflective ZnS Thin Films Prepared by CBD	S. Tec-Yam	2012	3.85	ZnCl2, KOH, NH4NO3	0.02	0.2	1.5	NH4NO3	NaN	NaN	90	NaN	No	S. Tec-Yam, J. Rojas, V. Rejon, A.I. Oliva	Mater. Chem. and Phys.	136	386-393	Eg ranges reported for two concentrations of KOH, 3.82-3.86 eV and 3.80-3.89 eV
Effect of Different Complexing Agents on the Properties of CBD ZnS Thin Films	J. Liu	2014	3.72	Tri-sodium citrate complexing agent	0.1	0.75	0.7	NH4OH	0.2	tri-sodium citrate	70	NaN	No	J. Liu, A. Wei, and Y. Zhao	J. of Alloys and Compounds	588	228-234	4 samples tested with varied complexing agent (tri-sodium citrate) concentration, lowest bandgap
Effect of Different Complexing Agents on the Properties of CBD ZnS Thin Films	J. Liu	2014	3.8	Tri-sodium citrate complexing agent	0.1	0.75	0.7	NH4OH	0.5	tri-sodium citrate	70	NaN	No	J. Liu, A. Wei, and Y. Zhao	J. of Alloys and Compounds	588	228-234	4 samples tested with varied complexing agent (tri-sodium citrate) concentration, bandgap averaged
Effect of Different Complexing Agents on the Properties of CBD ZnS Thin Films	J. Liu	2014	3.87	Tri-sodium citrate complexing agent	0.1	0.75	0.7	NH4OH	0.8	tri-sodium citrate	70	NaN	No	J. Liu, A. Wei, and Y. Zhao	J. of Alloys and Compounds	588	228-234	4 samples tested with varied complexing agent (tri-sodium citrate) concentration, highest bandgap
Effect of Different Complexing Agents on the Properties of CBD ZnS Thin Films	J. Liu	2014	3.74	NH2-NH2	0.1	0.75	0.7	NH4OH	0.16	Hydrazine	70	NaN	Yes	J. Liu, A. Wei, and Y. Zhao	J. of Alloys and Compounds	588	228-234	4 samples tested with varied complexing agent (hydrazine) concentration, lowest bandgap
Effect of Different Complexing Agents on the Properties of CBD ZnS Thin Films	J. Liu	2014	3.78	NH2-NH2	0.1	0.75	0.7	NH4OH	0.648	Hydrazine	70	NaN	Yes	J. Liu, A. Wei, and Y. Zhao	J. of Alloys and Compounds	588	228-234	4 samples tested with varied complexing agent (hydrazine) concentration, bandgap averaged
Effect of Different Complexing Agents on the Properties of CBD ZnS Thin Films	J. Liu	2014	3.88	NH2-NH2	0.1	0.75	0.7	NH4OH	1.12	Hydrazine	70	NaN	Yes	J. Liu, A. Wei, and Y. Zhao	J. of Alloys and Compounds	588	228-234	4 samples tested with varied complexing agent (hydrazine) concentration, highest bandgap
Effect of Hydrazine on ZnS Thin Films Over Glass	P. A. Luque	2014	3.92	NH2-NH2, concentrations not reported				Concentrations not reported			52	NaN	Yes	P.A. Luque, A.S. Villasenor, M.A. Quevedo-Lopez, and A. Olivas	Chalcogenide Letters	11	105-109	Range of Eg reported, 3.79 - 4.21 eV. Varied T and hydrazine concentration. Used average Eg and average T
Effect of temperature on structural and optical properties of ZnS thin films by CBD without stirring the reaction bath	H. Ke	2014	4.06	NH2-NH2 and NH4OH	0.08	0.07	1.33	NH4OH	2.3	Hydrazine	50	NaN	Yes	H. Ke, S. Duo, T. Liu, Q. Sin, C. Ruan, X. Fei, J. Tan, S. Zhan	Mat. Sci. in Semiconductor Processing	18	28-35	Min T (of 3 tested) and corresponding Eg
Effect of temperature on structural and optical properties of ZnS thin films by CBD without stirring the reaction bath	H. Ke	2014	3.93	NH2-NH2 and NH4OH	0.08	0.07	1.33	NH4OH	2.3	Hydrazine	70	NaN	Yes	H. Ke, S. Duo, T. Liu, Q. Sin, C. Ruan, X. Fei, J. Tan, S. Zhan	Mat. Sci. in Semiconductor Processing	18	28-35	Median T (of 3 tested) and corresponding Eg
Effect of temperature on structural and optical properties of ZnS thin films by CBD without stirring the reaction bath	H. Ke	2014	4.03	NH2-NH2 and NH4OH	0.08	0.07	1.33	NH4OH	2.3	Hydrazine	90	NaN	Yes	H. Ke, S. Duo, T. Liu, Q. Sin, C. Ruan, X. Fei, J. Tan, S. Zhan	Mat. Sci. in Semiconductor Processing	18	28-35	Max T (of 3 tested) and corresponding Eg
Characteristics of CBD ZnOS thin films and the effects of their annealing on CIGS solar cell efficiency	T. M. Hsieh	2013	3.3	NH2-NH2, Varied annealing conditions	0.05	0.4	0.8	NH4OH	1.8	Hydrazine	70	NaN	Yes	T.M. Hsieh, S.J. Lue, J. Ao, Y. Sun, W.S. Feng, and L.B. Chang	J. of Power Sciences	246	443-448	As deposited bandgap 3.8 eV, others obtained after various annealing conditions
Characteristics of CBD ZnOS thin films and the effects of their annealing on CIGS solar cell efficiency	T. M. Hsieh	2013	3.5	NH2-NH2, Varied annealing conditions	0.05	0.4	0.8	NH4OH	1.8	Hydrazine	70	NaN	Yes	T.M. Hsieh, S.J. Lue, J. Ao, Y. Sun, W.S. Feng, and L.B. Chang	J. of Power Sciences	246	443-448	As deposited bandgap 3.8 eV, others obtained after various annealing conditions
Characteristics of CBD ZnOS thin films and the effects of their annealing on CIGS solar cell efficiency	T. M. Hsieh	2013	3.8	NH2-NH2, Varied annealing conditions	0.05	0.4	0.8	NH4OH	1.8	Hydrazine	70	NaN	Yes	T.M. Hsieh, S.J. Lue, J. Ao, Y. Sun, W.S. Feng, and L.B. Chang	J. of Power Sciences	246	443-448	As deposited bandgap 3.8 eV, others obtained after various annealing conditions
Shallow bath CBD of ZnS buffer layer for environmentally benign solar cell devices	R. K. Choubey	2014	3.63	Different type of bath geometry, no agitation	0.3	0.7	7				80	NaN	No	R.K. Choubey, Sunil Kumar, C.W. Lan	Adv. In Nat. Sci. Nanosci. Nanotechnol.	5	25015
Preparation and characterization of ZnS thin films prepared by CBD	A. Wei	2013	3.76	NH2-NH2	0.5	0.15	0.1	NH4OH	0.82	Hydrazine	70	0.667	Yes	A. Wei, J. Liu, M. Zhuang, and Y. Zhao	Materials Science in Semiconductor Processing	16	1478-1484	Minimum values of sulfur ion and ammonia concentrations; minimum Eg. Do not necessarily correspond
Preparation and characterization of ZnS thin films prepared by CBD	A. Wei	2013	3.84	NH2-NH2	0.5	0.675	0.65	NH4OH	0.82	Hydrazine	70	0.667	Yes	A. Wei, J. Liu, M. Zhuang, and Y. Zhao	Materials Science in Semiconductor Processing	16	1478-1484	Average values of sulfur ion and ammonia concentrations; average Eg. Do not necessarily correspond
Preparation and characterization of ZnS thin films prepared by CBD	A. Wei	2013	3.87	NH2-NH2	0.5	1.05	1.2	NH4OH	0.82	Hydrazine	70	0.667	Yes	A. Wei, J. Liu, M. Zhuang, and Y. Zhao	Materials Science in Semiconductor Processing	16	1478-1484	Maximum values of sulfur ion and ammonia concentrations; maximum Eg. Do not necessarily correspond
CBD of nanocrystalline ZnS thin films: Influence of pH on the reaction solution	H. Lekiket	2013	4.1	NH2-NH2, pH from 9-11, thermal anneal at 550 C	Concentrations not reported			Concentrations not reported			80	NaN	Yes	H. Lekiket and M.S. Aida	Materials Science in Semiconductor Processing	16	1753-1758	Range of Eg values reported, (4.0-4.2) average value reported
Influence of deposition time on ZnS thin film growth over silica and glass substrates	P. A. Luque	2013	3.62	Zn acetate, TEA, tri-sodium citrate	0.15	1	1	tri-ethanolamine	0.5	tri-sodium citrate	80	NaN	No	P.A. Luque, M.A. Quevedo-Lopez, and A. Olivas	Materials Letters	106	49-51	Single Eg value reported
Green route fast synthesis and characterization of CBD nanocrystalline ZnS buffer layers	G. L. Agawane	2013	3.74	Zn acetate, tri-sodium citrate	0.2	0.4	0.2	tri-sodium citrate	NaN	NaN	95	1.2	No	G.L. Agawane, S.W. Shin, M.S. Kim, M.P. Suryawanshi, K.V. Gurav, A.V. Moholkar, J.Y. Lee, J.H. Yun, P.S. Patil, and J.H. Kim	Current Applied Physics	13	850-856	Average of 3 Eg values reported, deposition time varied
Effects of temperature on the morphology and optical properties of ZnS thin films by CBD	P. E. Martin-Varguez	2013	3.53	ZnCl2, KOH, NH4NO3, varied T and t	0.02	0.2	1.5	NH4NO3	NaN	NaN	50	NaN	No	P.E. Martin-Varguez, O. Ceh, I.J. Gonzalez-Panzo, S. Tec-Yam, R. Patino, and A.I. Oliva	2013 IOP Conf. Ser.: Mater. Sci. Eng.	45	NaN	Minimum Eg, minimum T. Not necessarily correlated
Effects of temperature on the morphology and optical properties of ZnS thin films by CBD	P. E. Martin-Varguez	2013	3.73	ZnCl2, KOH, NH4NO3, varied T and t	0.02	0.2	1.5	NH4NO3	NaN	NaN	70	NaN	No	P.E. Martin-Varguez, O. Ceh, I.J. Gonzalez-Panzo, S. Tec-Yam, R. Patino, and A.I. Oliva	2013 IOP Conf. Ser.: Mater. Sci. Eng.	45	NaN	Average Eg, Average T. Not necessarily correlated
Effects of temperature on the morphology and optical properties of ZnS thin films by CBD	P. E. Martin-Varguez	2013	4.11	ZnCl2, KOH, NH4NO3, varied T and t	0.02	0.2	1.5	NH4NO3	NaN	NaN	90	NaN	No	P.E. Martin-Varguez, O. Ceh, I.J. Gonzalez-Panzo, S. Tec-Yam, R. Patino, and A.I. Oliva	2013 IOP Conf. Ser.: Mater. Sci. Eng.	45	NaN	Maximum Eg, maximum T. Not necessarily correlated
Effect of deposition variables on properties of CBD ZnS thin films prepared in CBD	W. Liu	2013	3.94	Tri-sodium citrate complexing agent	0.03	0.06	0.08	tri-sodium citrate	NaN	NaN	80	NaN	No	W.L. Liu, C.S. Yang, S.H. Hsieh, W.J. Chen, and C.L. Fern	Applied Surface Science	264	213-218	All values averages
Non-toxic complexing agent tri-sodium citrate's effect on CBD ZnS thin films and its growth mechanism	G. L. Agawane	2012	3.53	Tri-sodium citrate complexing agent (concentrations varied), Zn Acetate	0.2	0.4	NaN	NH4OH	0.025	tri-sodium citrate	80	NaN	No	G.L. Agawane, S.W. Shin, A.V. Moholkar, K.V. Gurav, J.H. Yun, J.Y. Lee, and J.H. Kim	J. of Alloys and Compounds	535	53-61	Minimum Eg value, complexing agent concentrations varied
Non-toxic complexing agent tri-sodium citrate's effect on CBD ZnS thin films and its growth mechanism	G. L. Agawane	2012	3.72	Tri-sodium citrate complexing agent (concentrations varied), Zn Acetate	0.2	0.4	NaN	NH4OH	0.09	tri-sodium citrate	80	NaN	No	G.L. Agawane, S.W. Shin, A.V. Moholkar, K.V. Gurav, J.H. Yun, J.Y. Lee, and J.H. Kim	J. of Alloys and Compounds	535	53-61	Average Eg value, complexing agent concentrations varied
Non-toxic complexing agent tri-sodium citrate's effect on CBD ZnS thin films and its growth mechanism	G. L. Agawane	2012	3.8	Tri-sodium citrate complexing agent (concentrations varied), Zn Acetate	0.2	0.4	NaN	NH4OH	0.2	tri-sodium citrate	80	NaN	No	G.L. Agawane, S.W. Shin, A.V. Moholkar, K.V. Gurav, J.H. Yun, J.Y. Lee, and J.H. Kim	J. of Alloys and Compounds	535	53-61	Maximum Eg value, complexing agent concentrations varied
Ammonia free CBD of nanocrystalline ZnS thin film buffer layer for solar cells	A. Goudarzi	2008	3.68	Zn acetate, TAA, disodium-EDTA complexing agent, pH is 6	1	0.4	0.2	ethylenediamine tetra acetic acid disodium	NaN	NaN	71.5	NaN	No	A. Goudarzi, G.M. Aval, R. Sahraei, and H. Ahmadpoor	Thin Solid Films	516	4953-4957	Minimum Eg value, number of depositions varied
Ammonia free CBD of nanocrystalline ZnS thin film buffer layer for solar cells	A. Goudarzi	2008	3.74	Zn acetate, TAA, disodium-EDTA complexing agent, pH is 6	1	0.4	0.2	ethylenediamine tetra acetic acid disodium	NaN	NaN	71.5	NaN	No	A. Goudarzi, G.M. Aval, R. Sahraei, and H. Ahmadpoor	Thin Solid Films	516	4953-4957	Average Eg value, number of depositions varied
Ammonia free CBD of nanocrystalline ZnS thin film buffer layer for solar cells	A. Goudarzi	2008	3.78	Zn acetate, TAA, disodium-EDTA complexing agent, pH is 6	1	0.4	0.2	ethylenediamine tetra acetic acid disodium	NaN	NaN	71.5	NaN	No	A. Goudarzi, G.M. Aval, R. Sahraei, and H. Ahmadpoor	Thin Solid Films	516	4953-4957	Maximum Eg value, number of depositions varied
Compositional, structural, and optical study of nanocrystalline ZnS thin films prepared by a new CBD route	R. Sahraei	2008	3.75	ZnCl2, TAA, nitrilotriacetic acid	0.4	NaN	0.4	nitriloacetic acid	NaN	NaN	70	NaN	No	R. Sahraei, G.M. Aval, and A. Goudarzi	J. of Alloys and Compounds	466	488-492	Minimum Eg value, varied deposition times
Compositional, structural, and optical study of nanocrystalline ZnS thin films prepared by a new CBD route	R. Sahraei	2008	3.81	ZnCl2, TAA, nitrilotriacetic acid	0.4	NaN	0.4	nitriloacetic acid	NaN	NaN	70	NaN	No	R. Sahraei, G.M. Aval, and A. Goudarzi	J. of Alloys and Compounds	466	488-492	Average Eg value, varied deposition times
Compositional, structural, and optical study of nanocrystalline ZnS thin films prepared by a new CBD route	R. Sahraei	2008	3.9	ZnCl2, TAA, nitrilotriacetic acid	0.4	NaN	0.4	nitriloacetic acid	NaN	NaN	70	NaN	No	R. Sahraei, G.M. Aval, and A. Goudarzi	J. of Alloys and Compounds	466	488-492	Maximum Eg value, varied deposition times
CBD of ZnS based buffer layers using low toxicity materials	D. A. Johnston	2002	4.05	Tri-sodium citrate complexing agent	0.02	0.03	0.15	NH4OH	0.275	tri-sodium citrate	70	NaN	No	D.A. Johnston, M.H. Carletto, K.T.R. Reddy, I. Forbes, and R.W. Miles	Thin Solid Films	403-404	102-106	Single Eg value reported
Effect of bath concentration, temperature on the growth and properties of CBD ZnS films	P. U. Bhaskar	2012	3.7	TAA	0.03	0.1	7	NH4OH	NaN	NaN	30	0.389	No	P.U. Bhaskar, G.S. Babu, Y.B. Kishore Kumar, Y. Jayasree, and V.S. Raja	Mater. Chem. and Phys.	134	1106-1112	Range of values reported (3.70-3.95), minimum value. Mimimum value of varied parameters, does not necessarily correspond with Eg
Effect of bath concentration, temperature on the growth and properties of CBD ZnS films	P. U. Bhaskar	2012	3.87	TAA	0.05	0.04	9.8	NH4OH	NaN	NaN	60	0.667	No	P.U. Bhaskar, G.S. Babu, Y.B. Kishore Kumar, Y. Jayasree, and V.S. Raja	Mater. Chem. and Phys.	134	1106-1112	Range of values reported (3.70-3.95), average value. Average value of varied parameters, does not necessarily correspond with Eg
Effect of bath concentration, temperature on the growth and properties of CBD ZnS films	P. U. Bhaskar	2012	3.95	TAA	0.1	0.03	11	NH4OH	NaN	NaN	80	0.889	No	P.U. Bhaskar, G.S. Babu, Y.B. Kishore Kumar, Y. Jayasree, and V.S. Raja	Mater. Chem. and Phys.	134	1106-1112	Range of values reported (3.70-3.95), maximum value. Maximum value of varied parameters, does not necessarily correspond with Eg
Effect of pH on the characteristics of nanocrystalline ZnS thin films prepared by CBD method in acidic medium	S. R. Kang	2010	3.78	Zn acetate, TAA, disodium-EDTA complexing agent, varied pH	0.2	0.4	0.055	ethylenediamine tetra acetic acid disodium	NaN	NaN	80	NaN	No	S.R. Kang, S.W. Shin, D.S. Choi, A.V. Moholkar, J.H. Moon, and J.H. Kim	Current Applied Physics	10	S473-S477	Minimum Eg value, varied bath pH
Effect of pH on the characteristics of nanocrystalline ZnS thin films prepared by CBD method in acidic medium	S. R. Kang	2010	3.86	Zn acetate, TAA, disodium-EDTA complexing agent, varied pH	0.2	0.4	0.055	ethylenediamine tetra acetic acid disodium	NaN	NaN	80	NaN	No	S.R. Kang, S.W. Shin, D.S. Choi, A.V. Moholkar, J.H. Moon, and J.H. Kim	Current Applied Physics	10	S473-S477	Average Eg value, varied bath pH
Effect of pH on the characteristics of nanocrystalline ZnS thin films prepared by CBD method in acidic medium	S. R. Kang	2010	3.91	Zn acetate, TAA, disodium-EDTA complexing agent, varied pH	0.2	0.4	0.055	ethylenediamine tetra acetic acid disodium	NaN	NaN	80	NaN	No	S.R. Kang, S.W. Shin, D.S. Choi, A.V. Moholkar, J.H. Moon, and J.H. Kim	Current Applied Physics	10	S473-S477	Maximum Eg value, varied bath pH
Growth, structural, optical and electrical study of ZnS thin films depositedby solution growth technique	H. K. Sadekar	2008	3.72	TEA, NaOH	0.2	0.2	NaN	triethanolamine	NaN	NaN	90	NaN	No	H.K. Sadekar, N.G. Deshpande, Y.G. Gudage, A. Ghosh, S.D. Chavhan, S.R. Gosavi, and R. Sharma	J. of Alloys and Compounds	453	519-524	Single Eg value reported
Influence of annealing temperature on the structural, optical and electrical properties of amorphous ZnS thin films	F. Gode	2011	3.74	TAA, TEA, tri-sodium citrate	1	1	3.75	triethanolamine	0.66	tri-sodium citrate	25	NaN	No	F. Gode, E. Guneri, A. Kariper, C. Ulutas, F. Kirmizigul, and C. Gumus	J. Phys.: Conf. Ser.	326	NaN	Mimimum Eg value, varied annealing conditions (4.01 eV as deposited)
Influence of annealing temperature on the structural, optical and electrical properties of amorphous ZnS thin films	F. Gode	2011	3.87	TAA, TEA, tri-sodium citrate	1	1	3.75	triethanolamine	0.66	tri-sodium citrate	25	NaN	No	F. Gode, E. Guneri, A. Kariper, C. Ulutas, F. Kirmizigul, and C. Gumus	J. Phys.: Conf. Ser.	326	NaN	Average Eg value, varied annealing conditions (4.01 eV as deposited)
Influence of annealing temperature on the structural, optical and electrical properties of amorphous ZnS thin films	F. Gode	2011	4.01	TAA, TEA, tri-sodium citrate	1	1	3.75	triethanolamine	0.66	tri-sodium citrate	25	NaN	No	F. Gode, E. Guneri, A. Kariper, C. Ulutas, F. Kirmizigul, and C. Gumus	J. Phys.: Conf. Ser.	326	NaN	Maximum Eg value, varied annealing conditions (4.01 eV as deposited)
Influence of humidity on the growth characteristics and properties of CBD ZnS thin films	Y. C. Lin	2014	3.78	NH2-NH2, varied relative humidity	0.15	0.9	NaN	NH4OH	NaN	Hydrazine	80	2	Yes	Y.C. Lin, Y.T. Chao, and P.C. Yao	Applied Surface Science	307	724-730	Lowest of 4 values (each at varied relative humidity)
Influence of humidity on the growth characteristics and properties of CBD ZnS thin films	Y. C. Lin	2014	3.91	NH2-NH2, varied relative humidity	0.15	0.9	NaN	NH4OH	NaN	Hydrazine	80	2	Yes	Y.C. Lin, Y.T. Chao, and P.C. Yao	Applied Surface Science	307	724-730	Average of 4 values (each at varied relative humidity)
Influence of humidity on the growth characteristics and properties of CBD ZnS thin films	Y. C. Lin	2014	3.96	NH2-NH2, varied relative humidity	0.15	0.9	NaN	NH4OH	NaN	Hydrazine	80	2	Yes	Y.C. Lin, Y.T. Chao, and P.C. Yao	Applied Surface Science	307	724-730	Highest of 4 values (each at varied relative humidity)
Mechanistic study of CBD of ZnS thin films from aqueous solutions containing Zn acetate and TAA by comparison with homogeneous precipitation	K. Yamaguchi	2003	3.69	TAA, Zn acetate	0.025	0.025	NaN	No complexing agent reported			50	NaN	No	K. Yamaguchi, T. Yoshida, D. Lincot, and H. Minoura	J. Phys. Chem. B.	107	387-397	Minimum values, varied parameters do not necessarily correspond with Eg
Mechanistic study of CBD of ZnS thin films from aqueous solutions containing Zn acetate and TAA by comparison with homogeneous precipitation	K. Yamaguchi	2003	3.75	TAA, Zn acetate	0.1	0.1	NaN	No complexing agent reported			70	NaN	No	K. Yamaguchi, T. Yoshida, D. Lincot, and H. Minoura	J. Phys. Chem. B.	107	387-397	Average values, varied parameters do not necessarily correspond with Eg
Mechanistic study of CBD of ZnS thin films from aqueous solutions containing Zn acetate and TAA by comparison with homogeneous precipitation	K. Yamaguchi	2003	3.76	TAA, Zn acetate	0.4	0.4	NaN	No complexing agent reported			90	NaN	No	K. Yamaguchi, T. Yoshida, D. Lincot, and H. Minoura	J. Phys. Chem. B.	107	387-397	Maximum values, varied parameters do not necessarily correspond with Eg
Preparation and characteristics of CBD ZnS thin films: Effect of different complexing agents	S. W. Shin	2012	3.84	Zn acetate, tri-sodium citrate, ethylenediamine tetra-acetate	0.2	0.4	0.2	tri-sodium citrate	0.4	ethylenediamine tetra-acetate	80	NaN	No	S.W. Shin, G.L. Agawane, M.G. Gang, A.V. Moholkar, J.H. Moon, J.H. Kim, and J.Y. Lee	J. of Alloys and Compounds	526	25-30	Mixture of tri-sodium citrate and EDTA
Preparation and characteristics of CBD ZnS thin films: Effect of different complexing agents	S. W. Shin	2012	3.87	Zn acetate, tri-sodium citrate, ethylenediamine tetra-acetate	0.2	0.4	NaN	tri-sodium citrate	0.4	ethylenediamine tetra-acetate	80	NaN	No	S.W. Shin, G.L. Agawane, M.G. Gang, A.V. Moholkar, J.H. Moon, J.H. Kim, and J.Y. Lee	J. of Alloys and Compounds	526	25-30	Tri-sodium citrate
Preparation and characteristics of CBD ZnS thin films: Effect of different complexing agents	S. W. Shin	2012	3.94	Zn acetate, tri-sodium citrate, ethylenediamine tetra-acetate	0.2	0.4	NaN	tri-sodium citrate	NaN	ethylenediamine tetra-acetate	80	NaN	No	S.W. Shin, G.L. Agawane, M.G. Gang, A.V. Moholkar, J.H. Moon, J.H. Kim, and J.Y. Lee	J. of Alloys and Compounds	526	25-30	No complexing agents used
A study on the improved growth rate and morphology of CBD ZnS thin film buffer layer for thin film solar cells in acidic medium	S. W. Shin	2011	3.81	Zn acetate, TAA, Hexamethylenetetramine complexing agent, tetra-acetate disodium complexing agent	0.2	0.4	0.055	tetra-acetate disodium salt	0.5	hexamethylenetetramine	80	NaN	No	S.W. Shin, S.R. Kang, K.V. Gurav, J.H. Yun, J.H. Moon, J.Y. Lee, and J.H. Kim	Solar Energy	85	2903-2911	Range of Eg values reported, (3.75-3.87) average value used
Physicochemical conditions for ZnS films deposited by chemical bath	I. J. Gonzalez-Panzo	2014	3.43	ZnCl2, KOH	0.02	0.2	0.5	NH4NO3	NaN	NaN	80	NaN	No	I.J. Gonzalez-Panzo, P.E. Martin-Varguez, and A.I. Oliva	J. of the Electrochemical Society	161	D181-D189	Minimum Eg
Physicochemical conditions for ZnS films deposited by chemical bath	I. J. Gonzalez-Panzo	2014	3.57	ZnCl2, KOH	0.02	0.2	1.05	NH4NO3	NaN	NaN	80	NaN	No	I.J. Gonzalez-Panzo, P.E. Martin-Varguez, and A.I. Oliva	J. of the Electrochemical Society	161	D181-D189	Average Eg
Physicochemical conditions for ZnS films deposited by chemical bath	I. J. Gonzalez-Panzo	2014	3.74	ZnCl2, KOH	0.02	0.2	1.6	NH4NO3	NaN	NaN	80	NaN	No	I.J. Gonzalez-Panzo, P.E. Martin-Varguez, and A.I. Oliva	J. of the Electrochemical Society	161	D181-D189	Maximum Eg
Effect of different annealing conditions on the properties of chemically deposited ZnS thin films on ITO coated glass substrates	S. W. Shin	2011	3.5	Zn acetate, tri-sodium citrate complexing agent, disodiumethylenediamine tetra-acetate complexing agent, varied annealing atmospheres	0.2	0.055	0.2	tri-sodium citrate	0.4	ethylenediamine tetra-acetate disodium	80	NaN	No	S.W. Shin, S.R. Kang, J.H. Yun, A.V. Moholkar, J.H. Moon, J.Y. Lee, and J.H. Kim	Solar Energy Materials & Solar Cells	95	856-863	Minimum Eg value, annealing conditions varied (3.76 eV as deposited)
Effect of different annealing conditions on the properties of chemically deposited ZnS thin films on ITO coated glass substrates	S. W. Shin	2011	3.7	Zn acetate, tri-sodium citrate complexing agent, disodiumethylenediamine tetra-acetate complexing agent, varied annealing atmospheres	0.2	0.055	0.2	tri-sodium citrate	0.4	ethylenediamine tetra-acetate disodium	80	NaN	No	S.W. Shin, S.R. Kang, J.H. Yun, A.V. Moholkar, J.H. Moon, J.Y. Lee, and J.H. Kim	Solar Energy Materials & Solar Cells	95	856-863	Average Eg value, annealing conditions varied (3.76 eV as deposited)
Effect of different annealing conditions on the properties of chemically deposited ZnS thin films on ITO coated glass substrates	S. W. Shin	2011	3.89	Zn acetate, tri-sodium citrate complexing agent, disodiumethylenediamine tetra-acetate complexing agent, varied annealing atmospheres	0.2	0.055	0.2	tri-sodium citrate	0.4	ethylenediamine tetra-acetate disodium	80	NaN	No	S.W. Shin, S.R. Kang, J.H. Yun, A.V. Moholkar, J.H. Moon, J.Y. Lee, and J.H. Kim	Solar Energy Materials & Solar Cells	95	856-863	Maximum Eg value, annealing conditions varied (3.76 eV as deposited)
ZnS thin films deposited with CBD process directed by different stirring speeds	Y. Zhang	2010	3.68	Different stirring speeds	0.025	0.27	2.9	NH4OH	NaN	NaN	81	NaN	No	Y. Zhang, X.Y. Dang, J. Tin, T. Yu, B.Z. Li, Q. He, F.Y. Li, and Y. Sun	Applied Surface Science	256	6871-6875	Single Eg value reported
An improved method for CBD of ZnS thin films	F. Long	2008	3.49	Zn acetate, tartaric acid and tri-sodium citrate complexing agents	0.1	0.15	0.2	tartaric acid	0.1	tri-sodium citrate	80	NaN	No	F. Long, W.M. Wang, Z.K. Cui, L.Z. Fan, Z.G. Zou, and T.K. Jia	Chemical Physics Letters	462	84-87	Eg value reported without substrate pre-treatment
An improved method for CBD of ZnS thin films	F. Long	2008	3.76	Zn acetate, tartaric acid and tri-sodium citrate complexing agents	0.1	0.15	0.2	tartaric acid	0.1	tri-sodium citrate	80	NaN	No	F. Long, W.M. Wang, Z.K. Cui, L.Z. Fan, Z.G. Zou, and T.K. Jia	Chemical Physics Letters	462	84-87	Eg value reported with substrate pre-treatment
Role of growth parameters on structural and optical properties of ZnS nanocluster thin films grown by solution growth technique	J. Lee	2002	3.69	Zn acetate, TEA	1	2	6	NH4OH	NaN	triethanolamine	75	0.625	No	J. Lee, S. Lee, S. Cho, S. Kim, I.Y. Park, and Y.D. Choi	Mater. Chem. and Phys.	77	254-260	Minimum Eg value, does not necessarily correspoond with minimum parameter values
Role of growth parameters on structural and optical properties of ZnS nanocluster thin films grown by solution growth technique	J. Lee	2002	3.8	Zn acetate, TEA	1.5	3	9	NH4OH	NaN	triethanolamine	82	2.92	No	J. Lee, S. Lee, S. Cho, S. Kim, I.Y. Park, and Y.D. Choi	Mater. Chem. and Phys.	77	254-260	Average Eg value, does not necessarily correspoond with average parameter values
Role of growth parameters on structural and optical properties of ZnS nanocluster thin films grown by solution growth technique	J. Lee	2002	3.91	Zn acetate, TEA	2	4	14	NH4OH	NaN	triethanolamine	88	3.67	No	J. Lee, S. Lee, S. Cho, S. Kim, I.Y. Park, and Y.D. Choi	Mater. Chem. and Phys.	77	254-260	Maximum Eg value, does not necessarily correspoond with maximum parameter values
Preparation of Znx(O,S)y thin films using modefied CBD method	C. D. Lokhande	2002	3.3	Disodium sulfide anion source, successive deposition	0.1	0.1	NaN	NH4OH	NaN	NaN	27	NaN	No	C.D. Lokhande, H.M. Pathan, M. Giersig, and H. Tributsch	Applied Surface Science	187	101-107	Single Eg value reported
CBD of ZnS thin films using sodium citrate as a complementary complexing agent	D. A. Johnston	2001	4.05	Sodium citrate	0.03	0.05	0.15				70	NaN	No	D. Johnston, I Forbes, K.T.R. Reddy, R.W. Miles	Journal of Materials Science Letters	20	921-923
Crystalline ZnS thin films by CBD method and its characterization	P. Roy	2006	3.69	Zn acetate, NH2-NH2, tartaric acid	0.045	0.065	NaN	tartaric acid	NaN	Hydrazine	85	0.611	Yes	P. Roy, J.R. Ota, and S.K. Srivastava	Thin Solid Films	515	1912-1917	Single Eg value reported
The effect of the pH value on the growth and properties of CBD ZnS thin films	A. Antony	2005	3.68	ZnCl2, NH2-NH2, varied pH	1	1	0.5	NH4Cl	NaN	Hydrazine	80	NaN	Yes	A. Antony, K.V. Murali, R. Manoj, and M.K. Jayaraj	Mater. Chem. and Phys.	90	106-110	Eg value corresponds to bath composition and a varied pH value
The effect of the pH value on the growth and properties of CBD ZnS thin films	A. Antony	2005	3.75	ZnNO3, NH2-NH2,	1	1	0.5	NH4NO3	NaN	Hydrazine	80	NaN	Yes	A. Antony, K.V. Murali, R. Manoj, and M.K. Jayaraj	Mater. Chem. and Phys.	90	106-110	Eg value corresponds to bath composition and a varied pH value
The effect of the pH value on the growth and properties of CBD ZnS thin films	A. Antony	2005	3.66	ZnCl2, NH2-NH2, varied pH	1	1	0.5	NH4Cl	NaN	Hydrazine	80	NaN	Yes	A. Antony, K.V. Murali, R. Manoj, and M.K. Jayaraj	Mater. Chem. and Phys.	90	106-110	Eg value corresponds to bath composition and a varied pH value
The effect of the pH value on the growth and properties of CBD ZnS thin films	A. Antony	2005	3.78	ZnCl2, NH2-NH2, varied pH	1	1	0.5	NH4Cl	NaN	Hydrazine	80	NaN	Yes	A. Antony, K.V. Murali, R. Manoj, and M.K. Jayaraj	Mater. Chem. and Phys.	90	106-110	Eg value corresponds to bath composition and a varied pH value
The effect of the pH value on the growth and properties of CBD ZnS thin films	A. Antony	2005	3.84	ZnNO3, NH2-NH2,	1	1	0.5	NH4NO3	NaN	Hydrazine	80	NaN	Yes	A. Antony, K.V. Murali, R. Manoj, and M.K. Jayaraj	Mater. Chem. and Phys.	90	106-110	Eg value corresponds to bath composition and a varied pH value
The effect of the pH value on the growth and properties of CBD ZnS thin films	A. Antony	2005	3.93	ZnNO3, NH2-NH2,	1	1	0.5	NH4NO3	NaN	Hydrazine	80	NaN	Yes	A. Antony, K.V. Murali, R. Manoj, and M.K. Jayaraj	Mater. Chem. and Phys.	90	106-110	Eg value corresponds to bath composition and a varied pH value
Investigations on the physical properties of the polycrystalline ZnS thin films deposited by CBD method	F. Gode	2007	3.86	TEA, tri-sodium citrate, Zn acetate	1	1	3.75	triethanolamine	0.66	tri-sodium citrate	80	NaN	No	F. Gode, C. Gumus, and M. Zor	Journal of Crystal Growth	299	136-141	Range of Eg values (3.79-3.93) reported, average value used.Deposition time varied
A study of the effects of ammonium salts on CBD ZnS thin films	I. O. Oladeji	1999	3.9	NH2-NH2, (NH4)2SO4	0.0075	0.0075	0.5	NH4OH	0.025	(NH4)2SO4	85	NaN	Yes	I.O. Oladeji and L. Chow	Thin Solid Films	339	148-153	Single Eg value reported, despite varying many properties
Synthesis and properties of CBD ZnS multilayer films	N. K. Allouche	2010	3.85	NH2-NH2	0.025	0.035	1	NH4OH	3	Hydrazine	90	NaN	Yes	N.K. Allouche, T. Nasr, N. Kamoun, and C. Guasch	Mater. Chem. and Phys.	123	620-624	Average of two Eg values for a particular bath chemistry
Synthesis and properties of CBD ZnS multilayer films	N. K. Allouche	2010	3.75	ZnCl2, NH2-NH2	0.077	0.071	1.39	NH4OH	2.29	Hydrazine	90	NaN	Yes	N.K. Allouche, T. Nasr, N. Kamoun, and C. Guasch	Mater. Chem. and Phys.	123	620-624	Average of two Eg values for a particular bath chemistry
Structure, surface morphological and opto-electronic properties of ZnS thin films deposited by dip method	P. P. Hankare	2008	3.7	NH2-NH2, succinic acid complexing agent (hydrazine concentration not given)	0.2	0.2	2.8	NH4OH	1	Succinic acid	5	NaN	Yes	P.P. Hankare, P.A. Chate, D.J. Sathe, and A.A. Patil	Applied Surface Science	256	81-84	Single Eg value reported
Effect of [Zn]/[S] ratios on the properties of CBD ZnS thin films	Z. Q. Li	2010	3.65	NH2-NH2, (NH4)2SO4, 2 M ammonium hydroxide	0.15	0.15	0.25	(NH4)2SO4	2	Hydrazine	90	NaN	Yes	Z.Q. Li, J.H. Shi, Q.Q. Liu, Z.A. Wang, Z. Sun, and S.M. Huang	Applied Surface Science	257	122-126	Min values of Zn and S ion concentrations, and min Eg. Not necessarily correlated
Effect of [Zn]/[S] ratios on the properties of CBD ZnS thin films	Z. Q. Li	2010	3.7	NH2-NH2, (NH4)2SO4, 2 M ammonium hydroxide	0.18	0.41	0.25	(NH4)2SO4	2	Hydrazine	90	NaN	Yes	Z.Q. Li, J.H. Shi, Q.Q. Liu, Z.A. Wang, Z. Sun, and S.M. Huang	Applied Surface Science	257	122-126	Average values. Not necessarily correlated
Effect of [Zn]/[S] ratios on the properties of CBD ZnS thin films	Z. Q. Li	2010	3.74	NH2-NH2, (NH4)2SO4, 2 M ammonium hydroxide	0.3	0.9	0.25	(NH4)2SO4	2	Hydrazine	90	NaN	Yes	Z.Q. Li, J.H. Shi, Q.Q. Liu, Z.A. Wang, Z. Sun, and S.M. Huang	Applied Surface Science	257	122-126	Max values. Not necessarily correlated
Effect of pH on the properties of ZnS thin films grown by CBD	T. B. Nasr	2006	3.67	ZnCl2, NH2-NH2, varied pH	0.077	0.071	1.39	NH4OH	2.29	Hydrazine	90	NaN	Yes	T.B. Nasr, N. Kamoun, M. Kanzari, and R. Bennaceur	Thin Solid Films	500	4_8	Minimum Eg, pH varied
Effect of pH on the properties of ZnS thin films grown by CBD	T. B. Nasr	2006	3.78	ZnCl2, NH2-NH2	0.077	0.071	1.39	NH4OH	2.29	Hydrazine	90	NaN	Yes	T.B. Nasr, N. Kamoun, M. Kanzari, and R. Bennaceur	Thin Solid Films	500	4_8	Average Eg, pH varied
Effect of pH on the properties of ZnS thin films grown by CBD	T. B. Nasr	2006	3.88	ZnCl2, NH2-NH2	0.077	0.071	1.39	NH4OH	2.29	Hydrazine	90	NaN	Yes	T.B. Nasr, N. Kamoun, M. Kanzari, and R. Bennaceur	Thin Solid Films	500	4_8	Maximum Eg, pH varied
Effect of four different Zn salts and annealing treatment on growth, structural, mechanical, and optical properties of nanocrystalline ZnS thin films by CBD	T. Liu	2014	3.88	NH2-NH2, ZnSO4	0.068	0.071	1.1	NH4OH	2.3	Hydrazine	80	1.2	Yes	T. Liu, H. Ke, H. Zhang, S. Duo, Q. Sun, X. Fei, G. Zhou, H. Liu, and L. Fan	Mat. Sci. in Semiconductor Processing	26	301-311	Average of 2 Eg values from different deposition times
Effect of four different Zn salts and annealing treatment on growth, structural, mechanical, and optical properties of nanocrystalline ZnS thin films by CBD	T. Liu	2014	3.96	NH2-NH2, ZnCl2	0.068	0.071	1.1	NH4OH	2.3	Hydrazine	80	NaN	Yes	T. Liu, H. Ke, H. Zhang, S. Duo, Q. Sun, X. Fei, G. Zhou, H. Liu, and L. Fan	Mat. Sci. in Semiconductor Processing	26	301-311	Average of 2 Eg values from different deposition times
Effect of four different Zn salts and annealing treatment on growth, structural, mechanical, and optical properties of nanocrystalline ZnS thin films by CBD	T. Liu	2014	3.98	NH2-NH2, Zn(NO3)2	0.068	0.071	1.1	NH4OH	2.3	Hydrazine	80	NaN	Yes	T. Liu, H. Ke, H. Zhang, S. Duo, Q. Sun, X. Fei, G. Zhou, H. Liu, and L. Fan	Mat. Sci. in Semiconductor Processing	26	301-311	Average of 2 Eg values from different deposition times
Effect of four different Zn salts and annealing treatment on growth, structural, mechanical, and optical properties of nanocrystalline ZnS thin films by CBD	T. Liu	2014	3.89	NH2-NH2, Zn(CH3COO)2	0.068	0.071	1.1	NH4OH	2.3	Hydrazine	80	NaN	Yes	T. Liu, H. Ke, H. Zhang, S. Duo, Q. Sun, X. Fei, G. Zhou, H. Liu, and L. Fan	Mat. Sci. in Semiconductor Processing	26	301-311	Average of 2 Eg values from different deposition times
Role of Zn source in CBD of ZnS thin films on Si3N4	P.A. Luque	2014	3.71	Tri-sodium citrate, Zn sulfate	0.5	1	0.1	NH4OH	0.5	tri-sodium citrate	80	NaN	No	P.A. Luque, C.M. Gomez-Gutierrez, G. Lastra, A. Carillo-Castillo, M.A. Quevedo-Lopez, and A. Olivas	J. of Electronic Materials	43	4317-4321	Value for Zn sulfate
Role of Zn source in CBD of ZnS thin films on Si3N4	P.A. Luque	2014	3.72	Tri-sodium citrate, Zn acetate	0.5	1	0.1	NH4OH	0.5	tri-sodium citrate	80	NaN	No	P.A. Luque, C.M. Gomez-Gutierrez, G. Lastra, A. Carillo-Castillo, M.A. Quevedo-Lopez, and A. Olivas	J. of Electronic Materials	43	4317-4322	Value for Zn acetate
Role of Zn source in CBD of ZnS thin films on Si3N4	P.A. Luque	2014	3.74	Tri-sodium citrate, Zn nitrate	0.5	1	0.1	NH4OH	0.5	tri-sodium citrate	80	NaN	No	P.A. Luque, C.M. Gomez-Gutierrez, G. Lastra, A. Carillo-Castillo, M.A. Quevedo-Lopez, and A. Olivas	J. of Electronic Materials	43	4317-4323	Value for Zn nitrate
Preparation and characterization of nano-structured ZnS thin films grown on glass and n-type Si substrates using a new CBD technique	G. Nabiyouni	2011	3.99	Zn acetate, TAA, ethylenediamine, HCl	1	0.5	1	ethylenediamine	NaN	NaN	70	NaN	No	G. Nabiyouni, R. Sahraei, M. Toghiany, M.H. Majles Ara, and K. Hedayati	Rev. Adv. Mater. Sci.	27	52-57	Range of Eg reported, 3.97-4.00. Deposition time varied
Fabrication and characterization of nano-structured ZnS thin films as the buffer layers in solar cells	A. Goudarzi	2014	4.07	Zn acetate, TEA, TAA, sulfuric acid	0.12	0.24	0.12	triethylamine	NaN	NaN	50	NaN	No	A. Goudarzi, A. Dorbeygi Namghi, and C.S. Ha	RSC Adv.	4	59764-59771	Min T, corresponding Eg
Fabrication and characterization of nano-structured ZnS thin films as the buffer layers in solar cells	A. Goudarzi	2014	3.92	Zn acetate, TEA, TAA, sulfuric acid	0.12	0.24	0.12	triethylamine	NaN	NaN	70	NaN	No	A. Goudarzi, A. Dorbeygi Namghi, and C.S. Ha	RSC Adv.	4	59764-59771	Average T, corresponding Eg
Fabrication and characterization of nano-structured ZnS thin films as the buffer layers in solar cells	A. Goudarzi	2014	3.88	Zn acetate, TEA, TAA, sulfuric acid	0.12	0.24	0.12	triethylamine	NaN	NaN	90	NaN	No	A. Goudarzi, A. Dorbeygi Namghi, and C.S. Ha	RSC Adv.	4	59764-59771	Max T, corresponding Eg
Investigation of the effect of temperature on growth mechanism of nanocrystalline ZnS thin films	R. Sahraei	2008	4.05	Zn acetate, ethylenediamine, TAA, HCl	1	0.5	0.5	ethylenediamine	NaN	NaN	25	NaN	No	R. Sahraei, G.M. Aval, A. Baghizadeh, M. Lamehi-Rachti, A. Goudarzi, and M.H. Majles Ara	Materials Letters	62	4345-4347	Minimum T studied, corresponding Eg
Investigation of the effect of temperature on growth mechanism of nanocrystalline ZnS thin films	R. Sahraei	2008	3.85	Zn acetate, ethylenediamine, TAA, HCl	1	0.5	0.5	ethylenediamine	NaN	NaN	50	NaN	No	R. Sahraei, G.M. Aval, A. Baghizadeh, M. Lamehi-Rachti, A. Goudarzi, and M.H. Majles Ara	Materials Letters	62	4345-4347	Average T studied, corresponding Eg
Investigation of the effect of temperature on growth mechanism of nanocrystalline ZnS thin films	R. Sahraei	2008	3.8	Zn acetate, ethylenediamine, TAA, HCl	1	0.5	0.5	ethylenediamine	NaN	NaN	75	NaN	No	R. Sahraei, G.M. Aval, A. Baghizadeh, M. Lamehi-Rachti, A. Goudarzi, and M.H. Majles Ara	Materials Letters	62	4345-4347	Maximum T studied, corresponding Eg
Characterization of the ZnS thin film buffer layer for CIGS solar cells deposited by CBD process with different solution concentrations	Z.Y. Zhong	2012	3.73	ITO substrate	0.03	0.1	0.3	NH4OH	NaN	NaN	80	NaN	No	Z.Y. Zhong, E.S. Cho, and S.J. Kwon	Mater. Chem. and Phys.	135	287-292	Range of Eg reported (3.73-3.88), minimum values used. Do not necessarily correspond
Characterization of the ZnS thin film buffer layer for CIGS solar cells deposited by CBD process with different solution concentrations	Z.Y. Zhong	2012	3.81	ITO substrate	0.03	0.3	1.46	NH4OH	NaN	NaN	80	NaN	No	Z.Y. Zhong, E.S. Cho, and S.J. Kwon	Mater. Chem. and Phys.	135	287-292	Range of Eg reported (3.73-3.88), average values used. Do not necessarily correspond
Characterization of the ZnS thin film buffer layer for CIGS solar cells deposited by CBD process with different solution concentrations	Z.Y. Zhong	2012	3.88	ITO substrate	0.03	0.5	3	NH4OH	NaN	NaN	80	NaN	No	Z.Y. Zhong, E.S. Cho, and S.J. Kwon	Mater. Chem. and Phys.	135	287-292	Range of Eg reported (3.73-3.88), maximum values used. Do not necessarily correspond
Fast CBD of ZnOS buffer layers for CIGSe solar cells	M. Buffiere	2011	3.74	Successive depositions	0.15	0.6	4	NH4OH	NaN	Hydrazine	70	NaN	No	M. Buffiere, S. Harel, L. Arzel, C. Deudon, N. Barreau, and J.Kessler	Thin Solid Films	519	7575-7578	Single value, no hydrogen peroxide
Fast CBD of ZnOS buffer layers for CIGSe solar cells	M. Buffiere	2011	3.86	Successive depositions	0.15	0.6	4	NH4OH	NaN	Hydrazine	70	NaN	No	M. Buffiere, S. Harel, L. Arzel, C. Deudon, N. Barreau, and J.Kessler	Thin Solid Films	519	7575-7578	Single value with hydrogen peroxide
Role of thiourea in the kinetic of growth of the CBD ZnS films	I.J. Gonzalez-Panzo	2014	3.65	ZnCl2, KOH	0.0194	0.547	0.847	NH4NO3	NaN	NaN	60	NaN	No	I.J. Gonzalez-Panzo, P.E. Martin-Varguez, and A.I. Oliva	J. of the Electrochemical Society	161	D761-D767	Varied thiourea concentration and temperature. Eg value corresponds
Role of thiourea in the kinetic of growth of the CBD ZnS films	I.J. Gonzalez-Panzo	2014	3.67	ZnCl2, KOH	0.0194	0.348	0.847	NH4NO3	NaN	NaN	70	NaN	No	I.J. Gonzalez-Panzo, P.E. Martin-Varguez, and A.I. Oliva	J. of the Electrochemical Society	161	D761-D767	Varied thiourea concentration and temperature. Eg value corresponds
Role of thiourea in the kinetic of growth of the CBD ZnS films	I.J. Gonzalez-Panzo	2014	3.68	ZnCl2, KOH	0.0194	0.216	0.847	NH4NO3	NaN	NaN	80	NaN	No	I.J. Gonzalez-Panzo, P.E. Martin-Varguez, and A.I. Oliva	J. of the Electrochemical Society	161	D761-D767	Varied thiourea concentration and temperature. Eg value corresponds
Role of thiourea in the kinetic of growth of the CBD ZnS films	I.J. Gonzalez-Panzo	2014	3.67	ZnCl2, KOH	0.0194	0.134	0.847	NH4NO3	NaN	NaN	90	NaN	No	I.J. Gonzalez-Panzo, P.E. Martin-Varguez, and A.I. Oliva	J. of the Electrochemical Society	161	D761-D767	Varied thiourea concentration and temperature. Eg value corresponds
